# Supplementary material
Source: PubMed Central journal article supplement (PMC4911012)
Supplement: NIHMS792334-supplement-supplemental_file.pdf [file NIHMS792334-supplement-supplemental_file.pdf]

## Supplementary Materials for

### **HLA class II genes modulate vaccine-induced antibody responses to affect HIV-1 acquisition**

Heather A. Prentice, Georgia D. Tomaras, Daniel E. Geraghty, Richard Apps, Youyi Fong, Philip K. Ehrenberg, Morgane Rolland, Gustavo H. Kijak, Shelly J. Krebs, Wyatt Nelson, Allan DeCamp, Xiaoying Shen, Nicole L. Yates, Susan Zolla-Pazner, Sorachai Nitayaphan, Supachai Rerks-Ngarm, Jaranit Kaewkungwal, Punnee Pitisuttithum, Guido Ferrari, M. Juliana McElrath, David C. Montefiori, Robert T. Bailer, Richard A. Koup, Robert J. O'Connell, Merlin L. Robb, Nelson L. Michael, Peter B. Gilbert, Jerome H. Kim, Rasmi Thomas\*

\*Corresponding author. E-mail: rthomas@hivresearch.org

Published 15 July 2015, *Sci. Transl. Med.* **7**, 296ra112 (2015)

DOI: 10.1126/scitranslmed.aab4005

#### **The PDF file includes:**

Fig. S1. Multiple alignment of different Env (120–204) and partial V2 sequences (160–183).

Fig. S2. Cocystal structure of HIV-1 gp120 (red) binding to CD4 (green) and the Fab of mAb 17b (blue) (23).

Table S1. Odds ratios for two-way interaction analysis of HLA class II alleles with Env-specific IgA and Env (120–204)–specific IgG.

Table S2. Association between Env-specific IgA or Env (120–204)–specific IgG and HLA class II alleles present in more than 5% of the study population.

Table S3. High IgG binding to multiple Env (120–204) antigens correlates with presence of DPB1\*13 and is associated with decreased HIV-1 acquisition across multiple subtypes.

Table S4. IgG responses to five overlapping peptides spanning Env (120–204) were significantly associated with presence of DPB1\*13.

Table S5. Comparison of frequency of amino acid (AA) sites in Env-gp70 in RV144 breakthrough infections stratified by DPB1\*13.

Table S6. Odds ratios for IgA binding to different recombinant Env proteins on HIV-1 acquisition after stratification by absence or presence of HLA-DQB1\*06.

Table S7. Odds ratios for HIV-1 acquisition in univariate analyses of all HLA class II alleles present in the placebo controls.

Table S8. Odds ratios for HIV-1 acquisition in univariate analyses of all HLA class II alleles present in the vaccinated volunteers.

```

120
gp70_BCaseA_V1_V2      VKLTPLCVTLNCIDLRNATNATSNSTNTNTTSSSGGLMMEQGEIKNCSFNITTSIR
gp70_A_GN              VKLTPLCVTLDCNATAS-----NVTNEMRNCNCSFNITTELK
gp70_C_GN              VKLTPLCVTLHCTNATFKNNVTND-----MNKEIRNCSFNITTEIR
AEA244V1V2Tags293F    VKLTPPCVTLHCTNANLTKANLTVN--NRTNVSNIIGNITDEVNCSFNMTTELR
BioRV144_V2_AE        -----KKKTELR
BioRV144_V2_C         -----KKKTEIR
BioRV144_V2_B         -----KKKTSIR
                                                                : .*.::

                                                                204
gp70_BCaseA_V1_V2      DKVQKEYALFYKLDIVPIDNPK---NSTNYRLISCNTSVITQA
gp70_A_GN              DKKQOVYSLFYKLDVVQINEKN--ETDKYRLINCNTSAITQA
gp70_C_GN              DKKQQGYALFYRPDIVLLKENRNSNNSNSEYILINCNASTITQA
AEA244V1V2Tags293F    DKKQKVHALFYKLDIVPIEDNN--DSSEYRLINCNTSVIKQP
BioRV144_V2_AE        DKKQKVYALFYKLDIVQ-----
BioRV144_V2_C         DKKQKVYALFYRLDIVP-----
BioRV144_V2_B         DKVQKEYALFYKLDVVP-----
** *: :.***: *:*

```

**Fig. S1. Multiple alignment of different Env (120–204) and partial V2 sequences (160–183).** HIV-1 Env amino acid sequences corresponding to either positions 120–204 or 160–183, relative to the HXB2 sequence reference from different viral subtypes (see table S3) were aligned using Clustal Omega. Sequences matching DPB1\*13 specific epitope 120-133 are shown in bold.

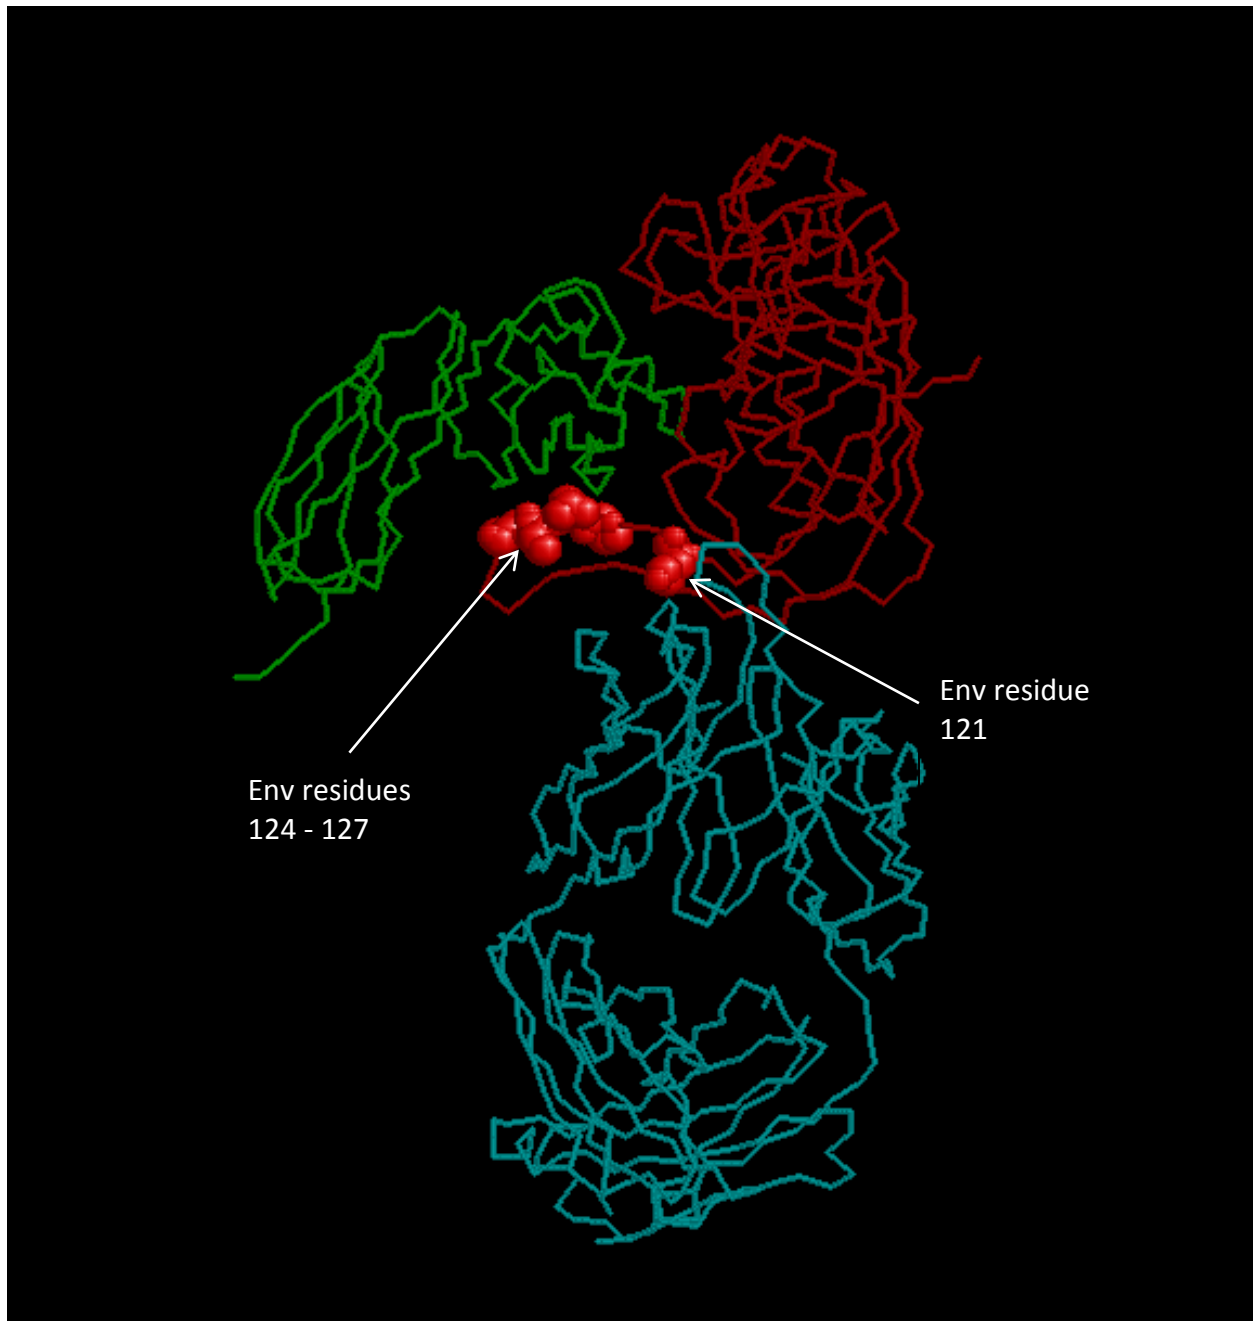

**Fig. S2. Cocrystal structure of HIV-1 gp120 (red) binding to CD4 (green) and the Fab of mAb 17b (blue) (23).** The IgG response identified, which was found to associate with both presence of DPB1\*13 and also reduced risk of HIV-1 acquisition, was directed to the Env residues with atoms highlighted in red spheres (residues 124P, 125L, 126C, 127V). IgG binding to this region of Env would be expected to disrupt interaction with CD4. Also highlighted in red is Env residue 121K, binding site of the well-characterized neutralizing mAb 17b.

**Table S1. Odds ratios for two-way interaction analysis of HLA class II alleles with Env-specific IgA and Env (120–204)–specific IgG.**

| Allele         | G grouping†    | Env-Specific<br>IgA-Allele Interaction* |                             |      |            |              |             | Env (120–204)–Specific<br>IgG-Allele Interaction* |           |      |      |
|----------------|----------------|-----------------------------------------|-----------------------------|------|------------|--------------|-------------|---------------------------------------------------|-----------|------|------|
|                |                | Infected<br>N=41<br>(%)                 | Uninfected<br>N=202‡<br>(%) | OR!! | 95% CI     | P            | q           | OR!!                                              | 95% CI    | P    | q    |
| DRB1*03        | DRB1*03:01:01G | 2 (4.9)                                 | 25 (12.4)                   | 0.76 | 0.11-5.36  | 0.78         | 0.93        | 1.13                                              | 0.23-5.57 | 0.88 | 0.93 |
| DRB1*04        |                | 5 (12.2)                                | 34 (16.8)                   | 0.79 | 0.32-1.97  | 0.62         | 0.93        | 1.15                                              | 0.40-3.31 | 0.80 | 0.93 |
| DRB1*07        |                | 11 (26.8)                               | 31 (15.3)                   | 0.94 | 0.44-1.99  | 0.87         | 0.93        | 1.89                                              | 0.74-4.80 | 0.18 | 0.74 |
| DRB1*09        | DRB1*09:01:02G | 8 (19.5)                                | 37 (18.3)                   | 1.17 | 0.51-2.67  | 0.71         | 0.93        | 1.09                                              | 0.44-2.71 | 0.85 | 0.93 |
| DRB1*11        |                | 3 (7.3)                                 | 27 (13.4)                   | 0.60 | 0.14-2.59  | 0.50         | 0.93        | 0.24                                              | 0.02-3.21 | 0.28 | 0.88 |
| DRB1*12        |                | 12 (29.3)                               | 63 (31.2)                   | 0.66 | 0.29-1.49  | 0.32         | 0.88        | 1.05                                              | 0.47-2.38 | 0.90 | 0.93 |
| DRB1*14        |                | 8 (19.5)                                | 36 (17.8)                   | 0.65 | 0.27-1.57  | 0.34         | 0.88        | 1.07                                              | 0.42-2.76 | 0.89 | 0.93 |
| DRB1*15        |                | 15 (36.6)                               | 85 (42.1)                   | 1.77 | 0.88-3.55  | 0.11         | 0.64        | 0.84                                              | 0.38-1.84 | 0.66 | 0.93 |
| DRB1*04:05     |                | 2 (4.9)                                 | 24 (11.9)                   | 0.97 | 0.24-3.98  | 0.97         | 0.97        | 1.70                                              | 0.43-6.65 | 0.45 | 0.93 |
| DRB1*07:01     | DRB1*07:01:01G | 10 (24.4)                               | 31 (15.3)                   | 1.08 | 0.50-2.31  | 0.85         | 0.93        | 2.48                                              | 0.93-6.61 | 0.07 | 0.52 |
| DRB1*12:02     |                | 12 (29.3)                               | 58 (28.7)                   | 0.70 | 0.31-1.60  | 0.40         | 0.93        | 1.11                                              | 0.49-2.50 | 0.81 | 0.93 |
| DRB1*15:01     | DRB1*15:01:01G | 7 (17.1)                                | 27 (13.4)                   | 4.86 | 1.26-18.79 | 0.02         | 0.32        | 1.56                                              | 0.61-4.02 | 0.35 | 0.88 |
| DRB1*15:02     |                | 9 (22.0)                                | 60 (29.7)                   | 1.09 | 0.49-2.42  | 0.83         | 0.93        | 0.49                                              | 0.18-1.35 | 0.17 | 0.74 |
| DQB1*02        |                | 12 (29.3)                               | 45 (22.3)                   | 1.05 | 0.50-2.21  | 0.90         | 0.93        | 1.52                                              | 0.66-3.53 | 0.33 | 0.88 |
| DQB1*03        |                | 23 (56.1)                               | 114 (56.4)                  | 0.89 | 0.46-1.72  | 0.73         | 0.93        | 1.03                                              | 0.49-2.19 | 0.93 | 0.94 |
| DQB1*04        |                | 0 (0.0)                                 | 21 (10.4)                   | -    | -          | -            | -           | -                                                 | -         | -    | -    |
| DQB1*05        |                | 23 (56.1)                               | 122 (60.4)                  | 0.85 | 0.43-1.67  | 0.63         | 0.93        | 0.78                                              | 0.36-1.71 | 0.53 | 0.93 |
| <b>DQB1*06</b> |                | 10 (24.4)                               | 39 (19.3)                   | 7.57 | 2.11-27.20 | <b>0.002</b> | <b>0.11</b> | 0.93                                              | 0.35-2.42 | 0.88 | 0.93 |
| DQB1*03:01     | DQB1*03:01:01G | 15 (36.6)                               | 72 (35.6)                   | 0.71 | 0.34-1.46  | 0.35         | 0.88        | 0.94                                              | 0.42-2.13 | 0.89 | 0.93 |
| DQB1*03:03     | DQB1*03:03:02G | 9 (22.0)                                | 43 (21.3)                   | 1.09 | 0.50-2.38  | 0.83         | 0.93        | 1.19                                              | 0.49-2.91 | 0.70 | 0.93 |
| DQB1*05:01     | DQB1*05:01:01G | 8 (19.5)                                | 49 (24.3)                   | 0.90 | 0.39-2.09  | 0.80         | 0.93        | 0.61                                              | 0.23-1.63 | 0.33 | 0.88 |

|            |                |           |           |      |            |      |      |      |           |      |      |
|------------|----------------|-----------|-----------|------|------------|------|------|------|-----------|------|------|
| DQB1*05:02 | DQB1*05:02:01G | 14 (34.1) | 73 (36.1) | 0.80 | 0.40-1.60  | 0.53 | 0.93 | 1.32 | 0.60-2.87 | 0.49 | 0.93 |
| DQB1*05:03 | DQB1*05:03:01G | 5 (12.2)  | 19 (9.4)  | 0.45 | 0.14-1.47  | 0.19 | 0.74 | 1.44 | 0.48-4.32 | 0.52 | 0.93 |
| DQB1*06:01 | DQB1*06:01:01G | 7 (17.1)  | 32 (15.8) | 6.79 | 1.53-30.16 | 0.01 | 0.26 | 0.84 | 0.27-2.61 | 0.77 | 0.93 |
| DPB1*02    |                | 15 (36.6) | 58 (28.9) | 0.75 | 0.37-1.54  | 0.43 | 0.93 | 1.66 | 0.76-3.66 | 0.21 | 0.78 |
| DPB1*04    |                | 14 (34.1) | 57 (28.4) | 1.74 | 0.85-3.56  | 0.13 | 0.72 | 1.26 | 0.57-2.82 | 0.57 | 0.93 |
| DPB1*05    |                | 11 (26.8) | 74 (36.8) | 0.41 | 0.18-0.91  | 0.03 | 0.32 | 0.59 | 0.25-1.39 | 0.23 | 0.81 |
| DPB1*13    |                | 11 (26.8) | 66 (32.8) | 0.44 | 0.20-0.95  | 0.04 | 0.32 | 0.27 | 0.10-0.76 | 0.01 | 0.26 |
| DPB1*02:01 |                | 9 (22.0)  | 33 (16.4) | 0.73 | 0.32-1.68  | 0.46 | 0.93 | 2.09 | 0.89-4.93 | 0.09 | 0.60 |
| DPB1*02:02 |                | 7 (17.1)  | 28 (13.9) | 1.10 | 0.39-3.05  | 0.86 | 0.93 | 0.62 | 0.18-2.18 | 0.46 | 0.93 |
| DPB1*04:01 |                | 9 (22.0)  | 45 (22.4) | 2.68 | 1.09-6.59  | 0.03 | 0.32 | 1.83 | 0.76-4.40 | 0.18 | 0.74 |

\* Previously reported values for Env-specific IgA and Env (120–204)–specific IgG (3). Sex, baseline behavioral risk score, and one significant principal component axis were included as covariates for all models.

† Nomenclature used for alleles that were ambiguous for exon 2 by 4-digit HLA typing.

‡ 201 HIV-1 uninfected individuals with complete DPB1 genotyping.

!! Estimated odds ratios and 95% CIs reflect the results from logistic regression analysis including a two-way interaction term for Env-specific IgA or Env (120–204)–specific IgG and presence of the given allele.

**Table S2. Association between Env-specific IgA or Env (120–204)–specific IgG and HLA class II alleles present in more than 5% of the study population.**

| Allele         | n (%)†     | Env-Specific IgA* |      |      | Env (120–204)–Specific IgG* |              |             |
|----------------|------------|-------------------|------|------|-----------------------------|--------------|-------------|
|                |            | $\beta \pm SE$    | P    | q    | $\beta \pm SE$              | P            | q           |
| DRB1*03        | 27 (11.1)  | -0.28 ± 0.20      | 0.17 | 0.52 | -0.04 ± 0.20                | 0.83         | 0.94        |
| DRB1*04        | 39 (16.0)  | 0.03 ± 0.18       | 0.85 | 0.94 | 0.09 ± 0.18                 | 0.60         | 0.85        |
| DRB1*07        | 42 (17.3)  | -0.10 ± 0.17      | 0.56 | 0.85 | -0.35 ± 0.17                | 0.04         | 0.36        |
| DRB1*09        | 45 (18.5)  | 0.34 ± 0.16       | 0.04 | 0.36 | 0.20 ± 0.17                 | 0.23         | 0.58        |
| DRB1*11        | 30 (12.3)  | 0.10 ± 0.20       | 0.61 | 0.85 | -0.24 ± 0.19                | 0.22         | 0.58        |
| DRB1*12        | 75 (30.9)  | -0.28 ± 0.14      | 0.05 | 0.36 | 0.21 ± 0.14                 | 0.13         | 0.52        |
| DRB1*14        | 44 (18.1)  | -0.08 ± 0.17      | 0.64 | 0.85 | -0.01 ± 0.17                | 0.97         | 0.97        |
| DRB1*15        | 100 (41.2) | -0.01 ± 0.13      | 0.96 | 0.97 | 0.07 ± 0.13                 | 0.60         | 0.85        |
| DRB1*04:05     | 26 (10.7)  | 0.29 ± 0.21       | 0.17 | 0.52 | 0.35 ± 0.21                 | 0.09         | 0.50        |
| DRB1*07:01     | 41 (16.9)  | -0.07 ± 0.17      | 0.68 | 0.87 | -0.31 ± 0.17                | 0.07         | 0.48        |
| DRB1*12:02     | 70 (28.8)  | -0.30 ± 0.14      | 0.04 | 0.36 | 0.15 ± 0.14                 | 0.28         | 0.65        |
| DRB1*15:01     | 34 (14.0)  | 0.20 ± 0.19       | 0.29 | 0.65 | -0.10 ± 0.19                | 0.59         | 0.85        |
| DRB1*15:02     | 69 (28.4)  | -0.16 ± 0.14      | 0.25 | 0.63 | 0.20 ± 0.14                 | 0.15         | 0.52        |
|                |            |                   |      |      |                             |              |             |
| DQB1*02        | 57 (23.5)  | -0.16 ± 0.15      | 0.30 | 0.65 | -0.30 ± 0.15                | 0.05         | 0.36        |
| DQB1*03        | 137 (56.4) | 0.13 ± 0.13       | 0.33 | 0.68 | 0.03 ± 0.13                 | 0.76         | 0.89        |
| DQB1*04        | 21 (8.6)   | 0.11 ± 0.23       | 0.63 | 0.85 | 0.08 ± 0.23                 | 0.72         | 0.88        |
| DQB1*05        | 145 (59.7) | -0.17 ± 0.13      | 0.19 | 0.55 | -0.02 ± 0.13                | 0.88         | 0.94        |
| DQB1*06        | 49 (20.2)  | 0.12 ± 0.16       | 0.46 | 0.81 | -0.14 ± 0.16                | 0.40         | 0.77        |
| DQB1*03:01     | 87 (35.8)  | 0.08 ± 0.13       | 0.54 | 0.85 | 0.02 ± 0.13                 | 0.88         | 0.94        |
| DQB1*03:03     | 52 (21.4)  | 0.25 ± 0.16       | 0.10 | 0.50 | 0.16 ± 0.16                 | 0.31         | 0.67        |
| DQB1*05:01     | 57 (23.5)  | -0.02 ± 0.15      | 0.90 | 0.95 | 0.39 ± 0.15                 | 0.01         | 0.30        |
| DQB1*05:02     | 87 (35.8)  | -0.10 ± 0.13      | 0.46 | 0.81 | -0.12 ± 0.13                | 0.38         | 0.75        |
| DQB1*05:03     | 24 (9.9)   | -0.09 ± 0.22      | 0.68 | 0.87 | -0.15 ± 0.22                | 0.50         | 0.85        |
| DQB1*06:01     | 39 (16.0)  | 0.08 ± 0.18       | 0.64 | 0.85 | 0.03 ± 0.18                 | 0.87         | 0.94        |
|                |            |                   |      |      |                             |              |             |
| DPB1*02        | 73 (30.2)  | 0.08 ± 0.14       | 0.53 | 0.85 | -0.09 ± 0.14                | 0.50         | 0.85        |
| DPB1*04        | 71 (29.3)  | -0.20 ± 0.17      | 0.17 | 0.52 | -0.30 ± 0.14                | 0.03         | 0.36        |
| DPB1*05        | 85 (35.1)  | -0.04 ± 0.14      | 0.75 | 0.89 | 0.05 ± 0.14                 | 0.71         | 0.88        |
| <b>DPB1*13</b> | 77 (31.8)  | 0.18 ± 0.14       | 0.20 | 0.55 | 0.44 ± 0.14                 | <b>0.002</b> | <b>0.09</b> |
| DPB1*02:01     | 42 (17.4)  | 0.30 ± 0.17       | 0.08 | 0.50 | -0.02 ± 0.17                | 0.92         | 0.95        |
| DPB1*02:02     | 35 (14.5)  | -0.14 ± 0.18      | 0.44 | 0.81 | -0.27 ± 0.18                | 0.14         | 0.52        |
| DPB1*04:01     | 54 (22.3)  | -0.22 ± 0.15      | 0.15 | 0.52 | -0.25 ± 0.15                | 0.10         | 0.50        |

\* Previously reported values (3).

† 201 HIV-1 uninfected individuals with complete DPB1 genotyping.

**Table S3. High IgG binding to multiple Env (120–204) antigens correlates with presence of DPB1\*13 and is associated with decreased HIV-1 acquisition across multiple subtypes.**

| Antigen (HIV-1 subtype)*             | Alias              | DPB1*13 Association |                  | Antigen-DPB1*13 Interaction† |                        |              |
|--------------------------------------|--------------------|---------------------|------------------|------------------------------|------------------------|--------------|
|                                      |                    | $\beta \pm SD$      | P                | DPB1*13                      | Odds Ratio<br>(95% CI) | P            |
| Env 120–204–specific IgG (CRF01_AE)‡ | AEA244V1V2Tags293F | 0.38 ± 0.14         | <b>0.006</b>     | Present                      | 0.07 (0.01-0.41)       | <b>0.003</b> |
|                                      |                    |                     |                  | Absent                       | 0.93 (0.64-1.36)       | 0.71         |
|                                      |                    |                     |                  | Interaction                  | -                      | <b>0.009</b> |
| Env 120–204–specific IgG (B)‡        | gp70_BCaseA_V1_V2  | 0.45 ± 0.14         | <b>0.001</b>     | Present                      | 0.26 (0.10-0.67)       | <b>0.005</b> |
|                                      |                    |                     |                  | Absent                       | 1.03 (0.68-1.56)       | 0.90         |
|                                      |                    |                     |                  | Interaction                  | -                      | <b>0.01</b>  |
| Env 120–204–specific IgG (A)‡        | gp70_A_GN          | 0.55 ± 0.13         | <b>&lt;0.001</b> | Present                      | 0.31 (0.12-0.85)       | <b>0.02</b>  |
|                                      |                    |                     |                  | Absent                       | 1.14 (0.73-1.78)       | 0.55         |
|                                      |                    |                     |                  | Interaction                  | -                      | <b>0.02</b>  |
| Env 120–204–specific IgG (C)‡        | gp70_C_GN          | 0.42 ± 0.14         | <b>0.002</b>     | Present                      | 0.19 (0.07-0.52)       | <b>0.001</b> |
|                                      |                    |                     |                  | Absent                       | 0.98 (0.64-1.50)       | 0.93         |
|                                      |                    |                     |                  | Interaction                  | -                      | <b>0.006</b> |
| Env 160–183–specific IgG (CRF01_AE)  | BioRV144_V2_AE     | 0.35 ± 0.14         | <b>0.01</b>      | Present                      | 0.64 (0.27-1.50)       | 0.30         |
|                                      |                    |                     |                  | Absent                       | 0.83 (0.55-1.27)       | 0.40         |
|                                      |                    |                     |                  | Interaction                  | -                      | 0.71         |
| Env 160–183–specific IgG (B)         | BioRV144_V2_B      | 0.19 ± 0.14         | 0.18             | Present                      | 0.77 (0.37-1.61)       | 0.49         |
|                                      |                    |                     |                  | Absent                       | 0.90 (0.60-1.36)       | 0.63         |



|                              |               |             |             |             |                  |      |
|------------------------------|---------------|-------------|-------------|-------------|------------------|------|
|                              |               |             |             | Interaction | -                | 0.90 |
| Env 160–183–specific IgG (C) | BioRV144_V2_C | 0.33 ± 0.14 | <b>0.02</b> | Present     | 0.80 (0.36-1.76) | 0.58 |
|                              |               |             |             | Absent      | 0.95 (0.63-1.44) | 0.81 |
|                              |               |             |             | Interaction | -                | 0.70 |

---

\* Env sequences from different viral subtypes and their amino acid positions relative to HXB2 sequence.

† The odds ratio is reported per 1-SD increase; sex, baseline behavioral risk score, and one significant principal component axis were included as covariates.

‡ Antigen reported in Zolla-Pazner et al. 2014 (43).

**Table S4. IgG responses to five overlapping peptides spanning Env (120–204) were significantly associated with presence of DPB1\*13.**

| Peptide<br>(Start-end)* | Peptide Sequence | DPB1*13+, | DPB1*13+, | DPB1*13-, | DPB1*13-, | Fisher's<br>P |
|-------------------------|------------------|-----------|-----------|-----------|-----------|---------------|
|                         |                  | Yes %     | No %      | Yes %     | No %      |               |
| 116-130                 | LKPCVKLTPLCVTLN  | 9.1       | 90.9      | 2.4       | 97.6      | <b>0.04</b>   |
| 119-133                 | CVKLTPLCVTLNCTD  | 37.7      | 62.3      | 21.8      | 78.2      | <b>0.01</b>   |
| 163-177                 | TEIRDKKQKVYALFY  | 63.6      | 36.4      | 47.3      | 52.7      | <b>0.02</b>   |
| 166-180                 | RDKKQKVYSLFYRLD  | 40.3      | 59.7      | 26.7      | 73.3      | <b>0.04</b>   |
| 169-183                 | KKQVYALFYKLDVVP  | 15.6      | 84.4      | 4.8       | 95.2      | <b>0.01</b>   |

\* Env amino acid positions relative to the HXB2 reference.

**Table S5. Comparison of frequency of amino acid (AA) sites in Env-gp70 in RV144 breakthrough infections\* stratified by DPB1\*13.**

| HXB2<br>position | Consensus<br>AA | Vaccinated |    |          |    |       | Placebo  |    |          |    |       | Vaccinated   | Placebo     | DPB1*13+    | DPB1*13- |
|------------------|-----------------|------------|----|----------|----|-------|----------|----|----------|----|-------|--------------|-------------|-------------|----------|
|                  |                 | DPB1*13+   |    | DPB1*13- |    |       | DPB1*13+ |    | DPB1*13- |    |       | DPB1*13+     | DPB1*13+    | Vax vs      | Vax vs   |
|                  |                 | Yes        | No | Yes      | No | Total | Yes      | No | Yes      | No | Total | vs DPB1*13-  | vs DPB1*13- | Placebo     | Placebo  |
| 120              | V               | 7          | 1  | 34       | 2  | 44    | 18       | 0  | 47       | 1  | 66    |              |             |             |          |
| 124              | P               | 8          | 0  | 33       | 3  | 44    | 17       | 1  | 44       | 4  | 66    |              |             |             |          |
| 160              | N               | 8          | 0  | 36       | 0  | 44    | 17       | 1  | 48       | 0  | 66    |              |             |             |          |
| 165              | L               | 5          | 3  | 23       | 13 | 44    | 14       | 4  | 28       | 20 | 66    |              |             |             |          |
| 166              | R               | 4          | 4  | 25       | 11 | 44    | 8        | 10 | 29       | 19 | 66    |              |             |             |          |
| 168              | K               | 0          | 8  | 5        | 31 | 44    | 2        | 16 | 6        | 42 | 66    |              |             |             |          |
| 169              | K               | 4          | 4  | 26       | 10 | 44    | 13       | 5  | 44       | 4  | 66    |              |             |             |          |
| 170              | Q               | 5          | 3  | 28       | 8  | 44    | 11       | 7  | 37       | 11 | 66    |              |             |             |          |
| 171              | K               | 4          | 4  | 24       | 12 | 44    | 14       | 4  | 33       | 15 | 66    |              |             |             |          |
| 172              | V               | 6          | 2  | 29       | 7  | 44    | 13       | 5  | 37       | 11 | 66    |              |             |             |          |
| 173              | H               | 8          | 0  | 15       | 21 | 44    | 9        | 9  | 19       | 29 | 66    | <b>0.004</b> | 0.58        | <b>0.02</b> | 1.00     |
| 178              | K               | 5          | 3  | 28       | 8  | 44    | 9        | 9  | 34       | 14 | 66    |              |             |             |          |
| 179              | L               | 8          | 0  | 33       | 3  | 44    | 18       | 0  | 44       | 4  | 66    |              |             |             |          |
| 181              | I               | 8          | 0  | 32       | 4  | 44    | 14       | 4  | 35       | 13 | 66    |              |             |             |          |
| 197              | N               | 8          | 0  | 34       | 2  | 44    | 17       | 1  | 48       | 0  | 66    |              |             |             |          |

\* Virus sequences previously published in Rolland et al. 2012 (7)

**Table S6. Odds ratios for IgA binding to different recombinant Env proteins on HIV-1 acquisition after stratification by absence or presence of HLA-DQB1\*06.**

| Variable of Interest        | Interacting Variable | Infected N=41 (%) | Uninfected N=202 (%) | OR    | (95% CI)     | P            |
|-----------------------------|----------------------|-------------------|----------------------|-------|--------------|--------------|
| <b>A.conenv03</b>           | <b>DQB1*06</b>       |                   |                      |       |              |              |
| <b>gp140CF</b>              | Present              | 10 (24.4)         | 39 (19.3)            | 4.36  | (1.7-11.5)   | <b>0.003</b> |
| Subtype A                   | Absent               | 31 (75.6)         | 163 (80.7)           | 1.29  | (0.9-1.9)    | 0.17         |
|                             | Interaction          |                   |                      | -     | -            | <b>0.02</b>  |
| <b>IgA A.00MSA</b>          | <b>DQB1*06</b>       |                   |                      |       |              |              |
| <b>gp140CF</b>              | Present              | 10 (24.4)         | 39 (19.3)            | 4.41  | (1.7-11.7)   | <b>0.003</b> |
| Subtype A                   | Absent               | 31 (75.6)         | 163 (80.7)           | 1.04  | (0.7-1.5)    | 0.83         |
|                             | Interaction          |                   |                      | -     | -            | <b>0.01</b>  |
| <b>US1SIV<sub>cpz</sub></b> | <b>DQB1*06</b>       |                   |                      |       |              |              |
| <b>gp140</b>                | Present              | 10 (24.4)         | 39 (19.3)            | 2.09  | (1.0-4.2)    | <b>0.04</b>  |
| Chimp ancestral             | Absent               | 31 (75.6)         | 163 (80.7)           | 1.15  | (0.8-1.6)    | 0.42         |
|                             | Interaction          |                   |                      | -     | -            | 0.24         |
| <b>G.DRCBL</b>              | <b>DQB1*06</b>       |                   |                      |       |              |              |
| gp140CF                     | Present              | 10 (24.4)         | 39 (19.3)            | 2.01  | (1.0-4.1)    | 0.06         |
| Subtype G                   | Absent               | 31 (75.6)         | 163 (80.7)           | 1.27  | (0.9-1.8)    | 0.21         |
|                             | Interaction          |                   |                      | -     | -            | 0.28         |
| <b>E.97CNGX2F</b>           | <b>DQB1*06</b>       |                   |                      |       |              |              |
| <b>gp140CF</b>              | Present              | 10 (24.4)         | 39 (19.3)            | 4.94  | (1.9-12.8)   | <b>0.001</b> |
| Subtype CRF01_AE            | Absent               | 31 (75.6)         | 163 (80.7)           | 0.96  | (0.6-1.4)    | 0.84         |
|                             | Interaction          |                   |                      | -     | -            | <b>0.002</b> |
| <b>B.conenv03</b>           | <b>DQB1*06</b>       |                   |                      |       |              |              |
| <b>gp140CF</b>              | Present              | 10 (24.4)         | 39 (19.3)            | 28.66 | (0.8-982.7)  | 0.06         |
| Subtype B                   | Absent               | 31 (75.6)         | 163 (80.7)           | 1.07  | (0.7-1.6)    | 0.74         |
|                             | Interaction          |                   |                      | -     | -            | <b>0.05</b>  |
| <b>C.conenv03</b>           | <b>DQB1*06</b>       |                   |                      |       |              |              |
| <b>gp140CF</b>              | Present              | 10 (24.4)         | 39 (19.3)            | 3.61  | (0.9-14.1)   | 0.06         |
| Subtype C                   | Absent               | 31 (75.6)         | 163 (80.7)           | 1.08  | (0.7-1.6)    | 0.72         |
|                             | Interaction          |                   |                      | -     | -            | 0.10         |
| <b>CON6 gp120</b>           | <b>DQB1*06</b>       |                   |                      |       |              |              |
| Subtype B                   | Present              | 10 (24.4)         | 39 (19.3)            | 2.82  | (0.8-10.0)   | 0.11         |
|                             | Absent               | 31 (75.6)         | 163 (80.7)           | 0.94  | (0.6-1.4)    | 0.74         |
|                             | Interaction          |                   |                      | -     | -            | 0.14         |
| <b>CON-S</b>                | <b>DQB1*06</b>       |                   |                      |       |              |              |
| <b>gp140CF</b>              | Present              | 10 (24.4)         | 39 (19.3)            | 93.53 | (1.6->999.9) | <b>0.03</b>  |
| Subtype M                   | Absent               | 31 (75.6)         | 163 (80.7)           | 1.03  | (0.7-1.5)    | 0.88         |
|                             | Interaction          |                   |                      | -     | -            | <b>0.03</b>  |
| <b>G.conenv03</b>           | <b>DQB1*06</b>       |                   |                      |       |              |              |
| <b>gp140CF</b>              | Present              | 10 (24.4)         | 39 (19.3)            | 2.13  | (1.1-4.2)    | <b>0.03</b>  |
| Subtype G                   | Absent               | 31 (75.6)         | 163 (80.7)           | 1.14  | (0.8-1.7)    | 0.51         |
|                             | Interaction          |                   |                      | -     | -            | 0.13         |

|                         |                |           |            |      |            |              |
|-------------------------|----------------|-----------|------------|------|------------|--------------|
| <b>AE.conenv03140CF</b> | <b>DQB1*06</b> |           |            |      |            |              |
| Subtype CRF01_AE        | Present        | 10 (24.4) | 39 (19.3)  | 5.57 | (1.6-19.0) | <b>0.006</b> |
|                         | Absent         | 31 (75.6) | 163 (80.7) | 0.87 | (0.6-1.3)  | 0.48         |
|                         | Interaction    |           |            | -    | -          | <b>0.01</b>  |
| <b>B.JRFL gp140</b>     | <b>DQB1*06</b> |           |            |      |            |              |
| Subtype B               | Present        | 10 (24.4) | 39 (19.3)  | 4.08 | (1.2-14.5) | <b>0.03</b>  |
|                         | Absent         | 31 (75.6) | 163 (80.7) | 0.93 | (0.6-1.4)  | 0.70         |
|                         | Interaction    |           |            | -    | -          | <b>0.04</b>  |
| <b>E.92TH023 gD-</b>    | <b>DQB1*06</b> |           |            |      |            |              |
| Subtype CRF01_AE        | Present        | 10 (24.4) | 39 (19.3)  | 4.77 | (1.0-22.5) | <b>0.05</b>  |
|                         | Absent         | 31 (75.6) | 163 (80.7) | 1.06 | (0.7-1.6)  | 0.79         |
|                         | Interaction    |           |            | -    | -          | 0.09         |
| <b>E.A244 gD-</b>       | <b>DQB1*06</b> |           |            |      |            |              |
| Subtype CRF01_AE        | Present        | 10 (24.4) | 39 (19.3)  | 6.82 | (2.1-22.5) | <b>0.002</b> |
|                         | Absent         | 31 (75.6) | 163 (80.7) | 0.96 | (0.7-1.4)  | 0.85         |
|                         | Interaction    |           |            | -    | -          | <b>0.002</b> |

**Table S7. Odds ratios for HIV-1 acquisition in univariate analyses of all HLA class II alleles present in the placebo controls\*.**

| Allele         | Infected  | Uninfected | OR   | 95% CI      | P           |
|----------------|-----------|------------|------|-------------|-------------|
|                | N=67 (%)  | N=450 (%)  |      |             |             |
| DRB1*03        | 7 (10.4)  | 46 (10.2)  | 1.02 | (0.44-2.37) | 0.96        |
| DRB1*04        | 7 (10.4)  | 73 (16.3)  | 0.60 | (0.26-1.37) | 0.22        |
| DRB1*07        | 18 (26.9) | 87 (19.4)  | 1.53 | (0.85-2.75) | 0.16        |
| DRB1*09        | 14 (20.9) | 86 (19.2)  | 1.12 | (0.59-2.10) | 0.74        |
| DRB1*11        | 4 (6.0)   | 39 (8.7)   | 0.67 | (0.23-1.93) | 0.46        |
| DRB1*12        | 25 (37.3) | 145 (32.3) | 1.25 | (0.73-2.13) | 0.42        |
| DRB1*14        | 16 (23.9) | 71 (15.8)  | 1.67 | (0.90-3.09) | 0.10        |
| <b>DRB1*15</b> | 18 (26.9) | 184 (41.0) | 0.53 | (0.30-0.94) | <b>0.03</b> |
| DRB1*04:05     | 6 (9.0)   | 46 (10.2)  | 0.86 | (0.35-2.10) | 0.74        |
| DRB1*07:01     | 18 (26.9) | 87 (19.4)  | 1.53 | (0.85-2.75) | 0.16        |
| DRB1*12:02     | 23 (34.3) | 141 (31.4) | 1.14 | (0.66-1.96) | 0.63        |
| DRB1*15:01     | 6 (9.0)   | 74 (16.5)  | 0.50 | (0.21-1.20) | 0.12        |
| DRB1*15:02     | 12 (17.9) | 116 (25.8) | 0.63 | (0.32-1.21) | 0.16        |
|                |           |            |      |             |             |
| DQB1*02        | 22 (32.8) | 120 (26.7) | 1.34 | (0.77-2.33) | 0.30        |
| DQB1*03        | 37 (55.2) | 250 (55.7) | 0.98 | (0.59-1.65) | 0.94        |
| DQB1*04        | 5 (7.5)   | 42 (9.4)   | 0.78 | (0.30-2.05) | 0.62        |
| DQB1*05        | 40 (59.7) | 265 (59.0) | 1.03 | (0.61-1.74) | 0.92        |
| DQB1*06        | 10 (14.9) | 89 (19.8)  | 0.71 | (0.35-1.45) | 0.34        |
| DQB1*03:01     | 23 (34.3) | 153 (34.1) | 1.01 | (0.59-1.74) | 0.97        |
| DQB1*03:03     | 17 (25.4) | 103 (22.9) | 1.14 | (0.63-2.07) | 0.66        |
| DQB1*05:01     | 13 (19.4) | 114 (25.4) | 0.71 | (0.37-1.34) | 0.29        |
| DQB1*05:02     | 23 (34.3) | 136 (30.3) | 1.20 | (0.70-2.07) | 0.50        |
| DQB1*05:03     | 7 (10.4)  | 49 (10.9)  | 0.95 | (0.41-2.20) | 0.91        |
| DQB1*06:01     | 7 (10.4)  | 68 (15.1)  | 0.65 | (0.29-1.49) | 0.31        |
|                |           |            |      |             |             |
| DPB1*02        | 17 (25.4) | 114 (25.4) | 1.00 | (0.55-1.80) | 1.00        |
| DPB1*04        | 20 (29.9) | 125 (27.8) | 1.10 | (0.63-1.94) | 0.73        |
| DPB1*05        | 24 (35.8) | 180 (40.1) | 0.83 | (0.49-1.42) | 0.51        |
| DPB1*13        | 18 (26.9) | 142 (31.6) | 0.79 | (0.45-1.41) | 0.43        |
| DPB1*02:01     | 10 (14.9) | 78 (17.4)  | 0.83 | (0.41-1.71) | 0.62        |
| DPB1*02:02     | 8 (11.9)  | 42 (9.4)   | 1.31 | (0.59-2.94) | 0.51        |
| DPB1*04:01     | 15 (22.4) | 104 (23.2) | 0.96 | (0.52-1.77) | 0.89        |

\* Alleles found to have population frequencies (2N) greater than 5%.

**Table S8. Odds ratios for HIV-1 acquisition in univariate analyses of all HLA class II alleles present in the vaccinated volunteers\*.**

| Allele     | Infected<br>N=41 (%) | Uninfected<br>N=202† (%) | OR   | 95% CI    | P    |
|------------|----------------------|--------------------------|------|-----------|------|
| DRB1*03    | 2 (4.9)              | 25 (12.4)                | 0.32 | 0.07-1.42 | 0.14 |
| DRB1*04    | 5 (12.2)             | 34 (16.8)                | 0.69 | 0.24-1.97 | 0.49 |
| DRB1*07    | 11 (26.8)            | 31 (15.3)                | 2.11 | 0.94-4.72 | 0.07 |
| DRB1*09    | 8 (19.5)             | 37 (18.3)                | 1.16 | 0.48-2.80 | 0.74 |
| DRB1*11    | 3 (7.3)              | 27 (13.4)                | 0.50 | 0.14-1.76 | 0.28 |
| DRB1*12    | 12 (29.3)            | 63 (31.2)                | 0.90 | 0.42-1.92 | 0.79 |
| DRB1*14    | 8 (19.5)             | 36 (17.8)                | 1.11 | 0.47-2.63 | 0.81 |
| DRB1*15    | 15 (36.6)            | 85 (42.1)                | 0.74 | 0.36-1.50 | 0.41 |
| DRB1*04:05 | 2 (4.9)              | 24 (11.9)                | 0.37 | 0.08-1.69 | 0.20 |
| DRB1*07:01 | 10 (24.4)            | 31 (15.3)                | 1.87 | 0.82-4.25 | 0.14 |
| DRB1*12:02 | 12 (29.3)            | 58 (28.7)                | 0.99 | 0.46-2.12 | 0.99 |
| DRB1*15:01 | 7 (17.1)             | 27 (13.4)                | 1.41 | 0.56-3.56 | 0.47 |
| DRB1*15:02 | 9 (22.0)             | 60 (29.7)                | 0.58 | 0.25-1.31 | 0.19 |
| DQB1*02    | 12 (29.3)            | 45 (22.3)                | 1.47 | 0.69-3.15 | 0.32 |
| DQB1*03    | 23 (56.1)            | 114 (56.4)               | 0.94 | 0.47-1.86 | 0.85 |
| DQB1*04    | 0 (0.0)              | 21 (10.4)                | -    | -         | -    |
| DQB1*05    | 23 (56.1)            | 122 (60.4)               | 0.75 | 0.37-1.51 | 0.42 |
| DQB1*06    | 10 (24.4)            | 39 (19.3)                | 1.54 | 0.69-3.46 | 0.30 |
| DQB1*03:01 | 15 (36.6)            | 72 (35.6)                | 1.02 | 0.50-2.08 | 0.96 |
| DQB1*03:03 | 9 (22.0)             | 43 (21.3)                | 1.02 | 0.44-2.36 | 0.96 |
| DQB1*05:01 | 8 (19.5)             | 49 (24.3)                | 0.58 | 0.24-1.39 | 0.22 |
| DQB1*05:02 | 14 (34.1)            | 73 (36.1)                | 0.97 | 0.47-1.99 | 0.93 |
| DQB1*05:03 | 5 (12.2)             | 19 (9.4)                 | 1.36 | 0.46-3.96 | 0.58 |
| DQB1*06:01 | 7 (17.1)             | 32 (15.8)                | 1.28 | 0.51-3.18 | 0.60 |
| DPB1*02    | 15 (36.6)            | 58 (28.9)                | 1.51 | 0.74-3.09 | 0.26 |
| DPB1*04    | 14 (34.1)            | 57 (28.4)                | 1.28 | 0.62-2.66 | 0.51 |
| DPB1*05    | 11 (26.8)            | 74 (36.8)                | 0.64 | 0.30-1.38 | 0.26 |
| DPB1*13    | 11 (26.8)            | 66 (32.8)                | 0.65 | 0.30-1.40 | 0.27 |
| DPB1*02:01 | 9 (22.0)             | 33 (16.4)                | 1.58 | 0.68-3.69 | 0.29 |
| DPB1*02:02 | 7 (17.1)             | 28 (13.9)                | 1.33 | 0.53-3.34 | 0.54 |
| DPB1*04:01 | 9 (22.0)             | 45 (22.4)                | 0.94 | 0.41-2.13 | 0.88 |

\* Alleles found to have population frequencies (2N) greater than 5% when cases and controls were combined.

† 201 HIV-1 uninfected individuals with complete DPB1 genotyping.
